# Supplementary material for: Lactic acid is a sperm motility inactivation factor in the sperm storage tubules
Source: PubMed Central journal article supplement (PMC4664960; doi:10.1038/srep17643), 2015-12-01
Supplement: srep17643-s1.pdf [file srep17643-s1.pdf]

1 **Lactic acid is a sperm motility inactivation factor in the sperm storage tubules**

2 Mei Matsuzaki<sup>1,2</sup>, Shusei Mizushima<sup>1</sup>, Gen Hiyama<sup>1</sup>, Noritaka Hirohashi<sup>3</sup>, Kogiku  
3 Shiba<sup>4</sup>, Kazuo Inaba<sup>4</sup>, Tomohiro Suzuki<sup>5</sup>, Hideo Dohra<sup>5</sup>, Toshiyuki Ohnishi<sup>1</sup>,  
4 Yoshikatsu Sato<sup>7</sup>, Tetsuya Kohsaka<sup>1</sup> Yoshinobu Ichikawa<sup>1</sup> Yusuke Atsumi<sup>6</sup>, Takashi  
5 Yoshimura<sup>6,7</sup> and Tomohiro Sasanami<sup>1\*</sup>

6

7 <sup>1</sup>Department of Applied Biological Chemistry, Faculty of Agriculture, Shizuoka  
8 University, 836 Ohya, Shizuoka, Shizuoka 422-8529, Japan; <sup>2</sup>United Graduate School  
9 of Agricultural Science, Gifu University, 1-1 Yanagido, Gifu 501-1193, Japan; <sup>3</sup>Oki  
10 Marine Biological Station, Education and Research Center for Biological Resources,  
11 Faculty of Life and Environmental Science, Shimane University, 194 Kamo,  
12 Okinoshima-cho, Oki, Shimane 685-0024, Japan; <sup>4</sup>Shimoda Marine Research Center,  
13 University of Tsukuba, 5-10-1 Shimoda, Shizuoka 415-0025, Japan; <sup>5</sup>Research Institute  
14 of Green Science and Technology, Shizuoka University, 836 Ohya, Shizuoka, Shizuoka  
15 422-8529, Japan; <sup>6</sup>Graduate School of Bioagricultural Sciences, Nagoya University,  
16 Furo-cho, Chikusa-ku, Nagoya 464-8601, Japan; <sup>7</sup>Institute of Transformative  
17 Bio-Molecules (WPI-ITbM), Nagoya University, Furo-cho, Chikusa-ku, Nagoya  
18 464-8601, Japan

19

20 \*Correspondence to: Tomohiro Sasanami, Department of Applied Biological Chemistry,  
21 Faculty of Agriculture, Shizuoka University, 836 Ohya, Shizuoka, Shizuoka 422-8529,  
22 Japan. Email: atsasan@ipc.shizuoka.ac.jp

23

24 **Supplementary Information**

25

26 Supplementary Table S1

27

28 Supplementary Figure S1: Expression of monocarboxylate transporter 4 (MCT4) in the  
29 utero-vaginal junction (UVJ).

30

31 Supplementary Figure S2: Effects of various acids treatment on sperm motility.

32

33 Supplementary Figure S3: Effects of oligomycin and sodium vanadate on ATPase  
34 activity of sperm.

35

36 Supplementary Figure S4: Effects of in vitro storage on the morphology of  
37 spermatozoa.

38

39 Caption to Supplementary Movie 1: Effects of a flow-through fraction of utero vaginal  
40 junction (UVJ) extracts on sperm motility.

41

42 Caption to Supplementary Movie 2: Sperm motility in Hank's balanced salt solution  
43 (HBSS).

44

45 Caption to Supplementary Movie 3: Effects of L-lactic acid and D-lactic acid on sperm  
46 motility.

47

48 Caption to Supplementary Movie 4: Axonemal sliding of de-membraned sperm in a  
49 buffer at pH 7.4.

50

51 Caption to Supplementary Movie 5: Axonemal sliding of de-membraned sperm in a  
52 buffer at pH 5.4.

53

## Supplementary Table S1

Enrichment of gene ontology terms in differentially expressed sequences between SSTs and non-SST cells detected by PAGE

| GO_id      | GO_name                               | Number of sequences | Z score      | P-value     | False discovery rate |
|------------|---------------------------------------|---------------------|--------------|-------------|----------------------|
| GO:0005515 | MF protein binding                    | 2354                | -7.794049752 | 6.43929E-15 | 1.71E-12             |
| GO:0005840 | CC ribosome                           | 98                  | 6.548828012  | 5.79903E-11 | 5.93E-09             |
| GO:0003735 | MF structural constituent of ribosome | 99                  | 6.527433457  | 6.69063E-11 | 5.93E-09             |
| GO:0006412 | BP translation                        | 99                  | 6.373236731  | 1.8508E-10  | 1.23E-08             |
| GO:0005576 | CC extracellular region               | 110                 | 6.049948334  | 1.44892E-09 | 7.71E-08             |
| GO:0006820 | BP anion transport                    | 20                  | -5.426567452 | 5.74481E-08 | 2.55E-06             |
| GO:0005524 | MF ATP binding                        | 929                 | -5.361703161 | 8.24409E-08 | 3.13E-06             |
| GO:0008289 | MF lipid binding                      | 21                  | 5.334001178  | 9.60719E-08 | 3.19E-06             |
| GO:0003777 | MF microtubule motor activity         | 38                  | -4.870426596 | 1.11358E-06 | 3.29E-05             |
| GO:0007018 | BP microtubule-based movement         | 39                  | -4.827499659 | 1.38258E-06 | 3.44E-05             |
| GO:0003774 | MF motor activity                     | 58                  | -4.804414293 | 1.55205E-06 | 3.44E-05             |
| GO:0016459 | CC myosin complex                     | 58                  | -4.804414293 | 1.55205E-06 | 3.44E-05             |
| GO:0006468 | BP protein phosphorylation            | 423                 | -4.718625472 | 2.37444E-06 | 4.86E-05             |
| GO:0017048 | MF Rho GTPase binding                 | 12                  | -4.468511328 | 7.87658E-06 | 0.000149655          |
| GO:0005622 | CC intracellular                      | 367                 | 4.357143873  | 1.31771E-05 | 0.000233674          |
| GO:0004672 | MF protein kinase activity            | 415                 | -4.332896983 | 1.4716E-05  | 0.000244654          |
| GO:0005262 | MF calcium channel activity           | 10                  | -4.269214999 | 1.96162E-05 | 0.000306936          |

|            |                                                           |     |              |             |             |
|------------|-----------------------------------------------------------|-----|--------------|-------------|-------------|
| GO:0007156 | BP homophilic cell adhesion via plasma membrane adhesion  | 53  | -4.232014107 | 2.31608E-05 | 0.000342265 |
| GO:0005882 | CC intermediate filament                                  | 31  | 4.116758099  | 3.84239E-05 | 0.000537935 |
| GO:0070588 | BP calcium ion transmembrane transport                    | 10  | -4.036394977 | 5.42788E-05 | 0.000721908 |
| GO:0005856 | CC cytoskeleton                                           | 42  | -3.603256105 | 0.000314256 | 0.003980576 |
| GO:0016311 | BP dephosphorylation                                      | 20  | -3.210644436 | 0.001324377 | 0.016012922 |
| GO:0004198 | MF calcium-dependent cysteine-type endopeptidase activity | 13  | -3.162832965 | 0.00156242  | 0.017429501 |
| GO:0030036 | BP actin cytoskeleton organization                        | 18  | -3.152004905 | 0.001621535 | 0.017429501 |
| GO:0005737 | CC cytoplasm                                              | 221 | 3.149034063  | 0.001638111 | 0.017429501 |
| GO:0008017 | MF microtubule binding                                    | 36  | -3.130481343 | 0.001745201 | 0.017854749 |
| GO:0015074 | BP DNA integration                                        | 13  | -3.091820668 | 0.00198933  | 0.019598584 |
| GO:0004867 | MF serine-type endopeptidase inhibitor activity           | 18  | 3.072754654  | 0.002120928 | 0.019921593 |
| GO:0004871 | MF signal transducer activity                             | 46  | -3.065659791 | 0.002171903 | 0.019921593 |
| GO:0005179 | MF hormone activity                                       | 13  | 3.000344938  | 0.00269674  | 0.023911095 |
| GO:0008236 | MF serine-type peptidase activity                         | 21  | 2.976241845  | 0.002918046 | 0.025038717 |
| GO:0008146 | MF sulfotransferase activity                              | 34  | 2.892907378  | 0.003816938 | 0.031728297 |
| GO:0005509 | MF calcium ion binding                                    | 269 | -2.864577588 | 0.004175658 | 0.032881818 |
| GO:0019001 | MF guanyl nucleotide binding                              | 15  | -2.853316217 | 0.004326555 | 0.032881818 |
| GO:0031683 | MF G-protein beta/gamma-subunit complex binding           | 15  | -2.853316217 | 0.004326555 | 0.032881818 |
| GO:0016791 | MF phosphatase activity                                   | 25  | -2.831161577 | 0.004637929 | 0.034269142 |
| GO:0005198 | MF structural molecule activity                           | 60  | 2.801202112  | 0.005091262 | 0.035857906 |

|            |                                                         |     |              |             |             |
|------------|---------------------------------------------------------|-----|--------------|-------------|-------------|
| GO:0006810 | BP transport                                            | 127 | -2.799224055 | 0.005122558 | 0.035857906 |
| GO:0008237 | MF metallopeptidase activity                            | 18  | -2.79045819  | 0.00526335  | 0.035898746 |
| GO:0008168 | MF methyltransferase activity                           | 63  | 2.775133315  | 0.005517908 | 0.036694088 |
| GO:0030286 | CC dynein complex                                       | 12  | -2.752165169 | 0.005920265 | 0.038409524 |
| GO:0005215 | MF transporter activity                                 | 54  | -2.736886144 | 0.006202376 | 0.039281715 |
| GO:0008233 | MF peptidase activity                                   | 17  | 2.727139113  | 0.00638861  | 0.039520239 |
| GO:0016491 | MF oxidoreductase activity                              | 200 | 2.706477648  | 0.006800116 | 0.041109792 |
| GO:0016020 | CC membrane                                             | 689 | -2.668275556 | 0.00762417  | 0.045067316 |
| GO:0036459 | MF ubiquitinyl hydrolase activity                       | 51  | -2.616318016 | 0.008888373 | 0.051397983 |
| GO:0006457 | BP protein folding                                      | 51  | 2.565771027  | 0.010294676 | 0.058263485 |
| GO:0004129 | MF cytochrome-c oxidase activity                        | 15  | 2.515646606  | 0.011881425 | 0.065842897 |
| GO:0004553 | MF hydrolase activity, hydrolyzing O-glycosyl compounds | 39  | -2.383112906 | 0.017166928 | 0.093191895 |
| GO:0006629 | BP lipid metabolic process                              | 37  | 2.279286886  | 0.022650017 | 0.12049809  |
| GO:0045454 | BP cell redox homeostasis                               | 43  | 2.243244467  | 0.024881054 | 0.129771772 |
| GO:0004866 | MF endopeptidase inhibitor activity                     | 10  | -2.23035619  | 0.025723806 | 0.131587161 |
| GO:0006814 | BP sodium ion transport                                 | 25  | 2.215630772  | 0.0267168   | 0.134088091 |
| GO:0006281 | BP DNA repair                                           | 65  | 2.142772777  | 0.032131348 | 0.15827664  |
| GO:0005085 | MF guanyl-nucleotide exchange factor activity           | 25  | -2.106623274 | 0.035150248 | 0.167675308 |
| GO:0005507 | MF copper ion binding                                   | 18  | 2.097576928  | 0.035942535 | 0.167675308 |
| GO:0030001 | BP metal ion transport                                  | 19  | -2.079932185 | 0.037531753 | 0.167675308 |

|            |                                                                     |     |              |             |             |
|------------|---------------------------------------------------------------------|-----|--------------|-------------|-------------|
| GO:0003723 | MF RNA binding                                                      | 128 | 2.079504008  | 0.03757105  | 0.167675308 |
| GO:0005525 | MF GTP binding                                                      | 280 | 2.078047394  | 0.037704994 | 0.167675308 |
| GO:0016887 | MF ATPase activity                                                  | 87  | -2.076784014 | 0.037821498 | 0.167675308 |
| GO:0042626 | MF ATPase activity, coupled to transmembrane movement of substances | 28  | -2.039379711 | 0.041412146 | 0.176095407 |
| GO:0008083 | MF growth factor activity                                           | 31  | 2.037561024  | 0.041593853 | 0.176095407 |
| GO:0003779 | MF actin binding                                                    | 63  | -2.036433876 | 0.041706807 | 0.176095407 |
| GO:0006418 | BP tRNA aminoacylation for protein translation                      | 37  | 1.999249884  | 0.045581324 | 0.189447378 |
| GO:0006470 | BP protein dephosphorylation                                        | 85  | -1.988998362 | 0.046701384 | 0.190822657 |
| GO:0009058 | BP biosynthetic process                                             | 52  | 1.98318315   | 0.047346975 | 0.190822657 |
| GO:0006955 | BP immune response                                                  | 31  | 1.967460774  | 0.049130114 | 0.193423393 |

Notes: GO, gene ontology; PAGE, parametric analysis of gene set enrichment; BP, biological process; MF, molecular function; and CC, cellular component. We used log<sub>2</sub> Fold Change values between SSTs and non-SST cells to calculate Z scores and corresponding P-values for each GO term.

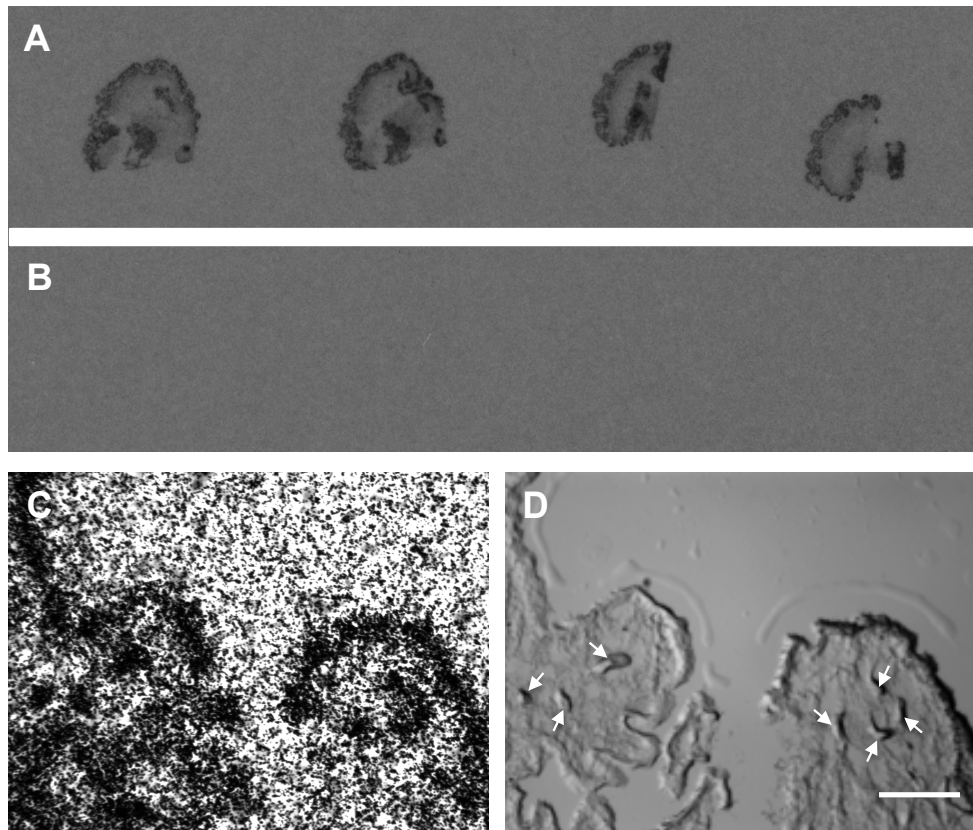

54

55 **Supplementary Figure S1: Expression of *monocarboxylate transporter 4 (MCT4)***  
 56 **mRNA in the utero-vaginal junction (UVJ).** a-b, Autoradiograms of the UVJ sections  
 57 after hybridization with  $^{33}\text{P}$ -labeled antisense probe specific for *MCT4* (a) or sense  
 58 probe (b) are shown. The autoradiogram was observed under a stereomicroscope (c) and  
 59 the corresponding area of the glass slide was photographed (d). Arrows in panel d  
 60 indicate SSTs. Note that the corresponding areas of the autoradiogram in panel c are  
 61 positively labeled. Representative results of two experiments are shown (n= 2). Scale  
 62 bar = 200  $\mu\text{m}$ .

63

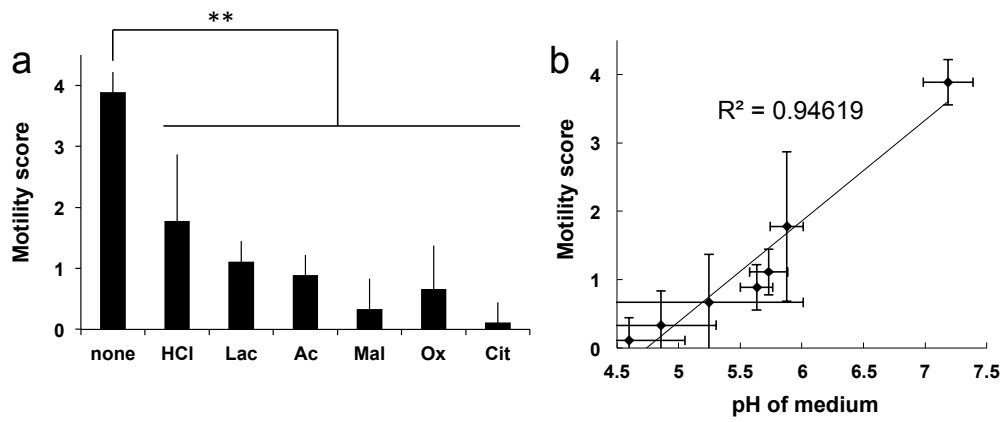

64

65 **Supplementary Figure S2: Effects of treatment with various acids on sperm**

66 **motility.** Ejaculated sperm were incubated with various organic acids including lactic  
67 acid (Lac), acetic acid (Ac), malic acid (Mal), oxaloacetic acid (Ox) and citric acid (Cit)  
68 at a final concentration of 10 mM. In controls, the effects of medium alone (none) and  
69 non-organic acid (HCl) were also examined. **a**, Sperm motility was scored (n=3) after  
70 10 min incubation of sperm with these media. \*\* denotes a significant difference from  
71 medium alone ( $P < 0.01$ ). **b**, The relationship between medium pH (x-axis) and motility  
72 score (y-axis) was indicated (n=3).

73

74



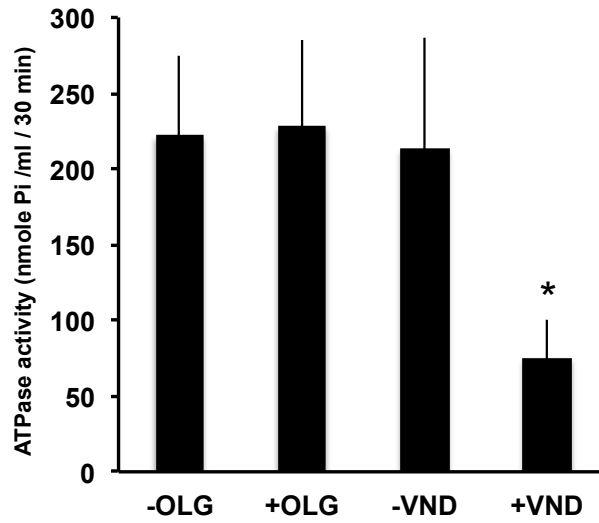

75

76 **Supplementary Figure S3: Effects of oligomycin and sodium vanadate on ATPase**

77 **activity of sperm.** De-membrated sperm were incubated with 1 mM ATP in the

78 presence or absence of 10  $\mu$ M oligomycin (OLG) or 20  $\mu$ M sodium vanadate (VND),

79 and the free phosphoric acid in the incubation mixture was measured using a microplate

80 reader. Values are mean  $\pm$  SEM of three independent experiments. \* denotes a

81 significant difference from respective control ( $P < 0.05$ ).

82

83

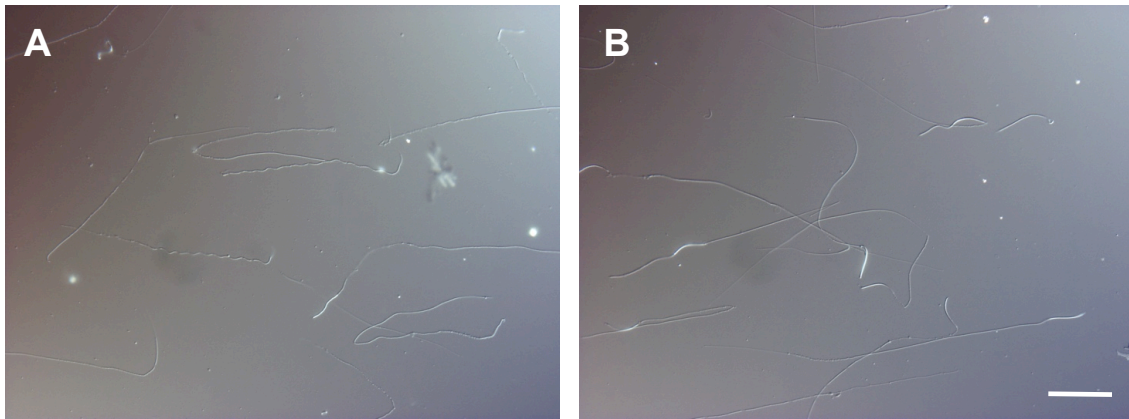

84

85 **Supplementary Figure S4: Effects of in vitro storage on the morphology of**  
86 **spermatozoa.** Ejaculated sperm were suspended in either a medium alone (*a*) or a  
87 medium containing 10 mM L-lactic acid with nitrogen gas bubbled through it for 5 min  
88 (*b*). After being stored for 5 days at 41.5°C, sperm were fixed with 3.7% formalin and  
89 smeared on a glass slide. Sperm morphology was observed under a microscope. The  
90 images shown are representative of images obtained from three independent  
91 experiments. Scale bar = 50  $\mu\text{m}$ .

92

93 Supplementary Movie 1. Effects of a flow-through fraction of utero vaginal junction  
94 (UVJ) extracts on sperm motility. UVJ extracts were passed through an ultrafiltration  
95 membrane (MW cutoff 10 kDa) and the flow-through fraction was examined using a  
96 sperm motility assay. Sperm movement was recorded using a high-speed camera (200  
97 frames per second), which showed that sperm motility was strongly suppressed by the  
98 addition of the fraction.

99

100 Supplementary Movie 2. Sperm motility in Hank's balanced salt solution (HBSS).  
101 Ejaculated sperm were suspended in HBSS and sperm movement was recorded using a  
102 high-speed camera (200 frames per second).

103

104 Supplementary Movie 3. Effects of L-lactic acid and D-lactic acid on sperm motility.  
105 Ejaculated sperm were suspended in Hank's balanced salt solution and 10 mM L-lactic  
106 acid or D-lactic acid was injected into sperm suspensions using a glass capillary. Sperm  
107 movement was recorded under a stereomicroscope.

108

109 Supplementary Movie 4. Axonemal sliding of de-membrated sperm in a buffer at pH  
110 7.4. Vigorous axonemal sliding was observed subsequent to perfusion of the ATP  
111 solution.

112

113 Supplementary Movie 5. Axonemal sliding of de-membrated sperm in a buffer at pH  
114 5.4. Little axonemal sliding was observed subsequent to perfusion of the ATP solution.
